# Supplementary material for: Crystal growth by leaps and bounds based on self-assembly: insight from titania
Source: Royal Society of Chemistry journal article supplement (doi:10.1039/c2ce25812a), 2012-01-01
Supplement: c2ce25812a.pdf [file c2ce25812a.pdf]

## Supporting Information for crystal growth by leaps and bounds based on self-assembly: Insight from titania

Li Luo<sup>1,2</sup>, Junfeng Hui<sup>1</sup>, Qiyu Yu<sup>1</sup>, Zhicheng Zhang<sup>1</sup>, Dengwei Jing<sup>2,\*</sup>, Pengpeng Wang<sup>1</sup>, Yong Yang<sup>1</sup>, Xun Wang<sup>1,\*</sup>

1. Department of Chemistry, Tsinghua University, Beijing, 100084, P. R. China

2. School of Energy and Power Engineering, Xi'an Jiaotong University, Xi'an 710061, P. R. China

\*Corresponding author e-mail: [wangxun@mail.tsinghua.edu.cn](mailto:wangxun@mail.tsinghua.edu.cn)  
[dwjing@mail.xjtu.edu.cn](mailto:dwjing@mail.xjtu.edu.cn)

### RECEIVED DATE

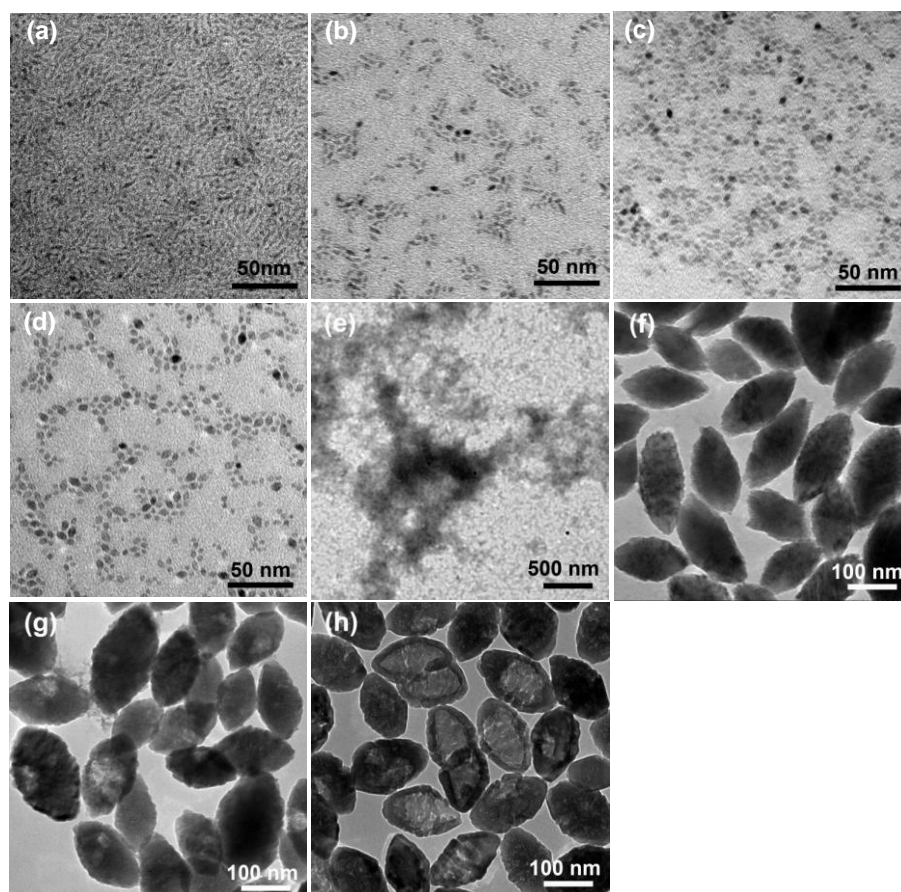

Fig. S1. TEM images of tiny TiO<sub>2</sub> NPs precipitated in non-H<sub>2</sub>SO<sub>4</sub> system (a, b, c, d) and spindle-shaped TiO<sub>2</sub> NPs obtained in the reaction system with H<sub>2</sub>SO<sub>4</sub> (e, f, g, h) under different reaction temperature for 8 h: (a,e) 90, (b,f) 120, (c,g) 150, (d,h) 180 °C.

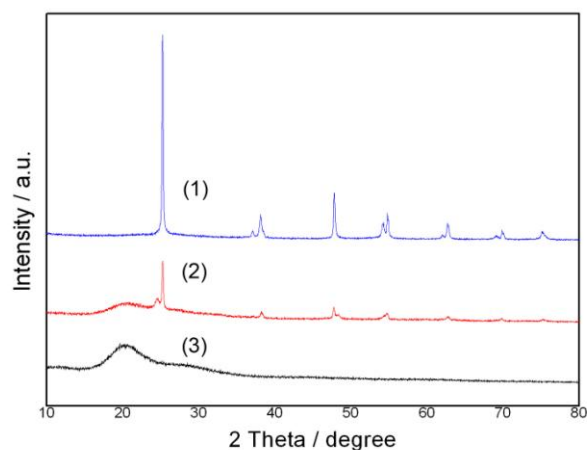

Fig. S2. XRD patterns of the products obtained in hydrothermal system with  $\text{H}_2\text{SO}_4$  at 150 °C for different duration: (1) 2, (2) 1, (3) 0.5 h.

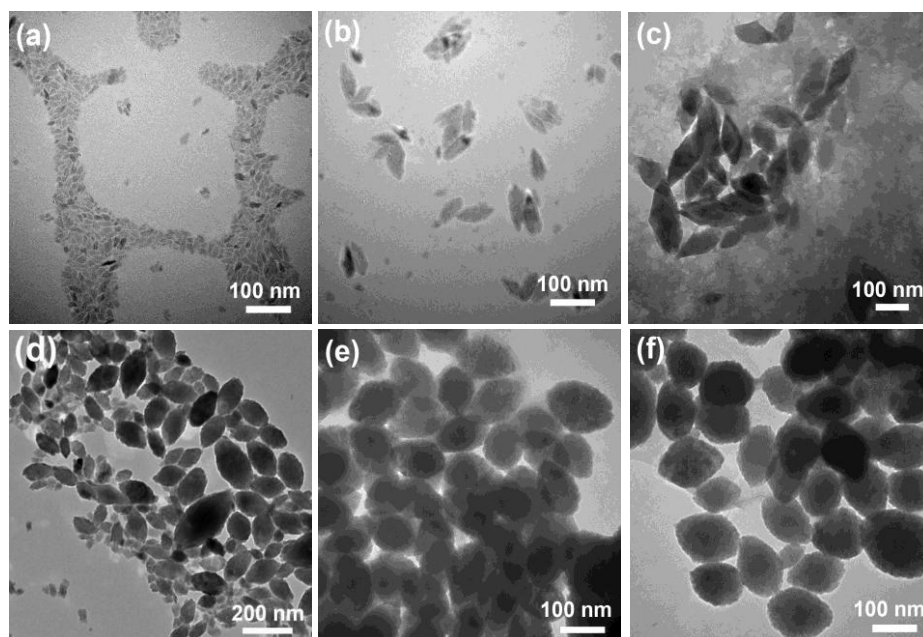

Fig. S3. TEM images of products synthesized with different amount of concentrated  $\text{H}_2\text{SO}_4$  in the system under the same reaction temperature of 150 °C and time of 3 h : (a) 0.05, (b) 0.1, (c) 0.25, (d) 0.5, (e) 0.75, (f) 1 ml.

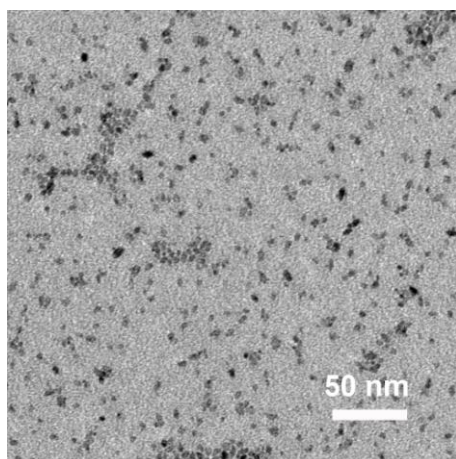

Fig. S4. TEM image of TiO<sub>2</sub> NPs obtained under the hydrothermal condition of 150 °C for 4 h..

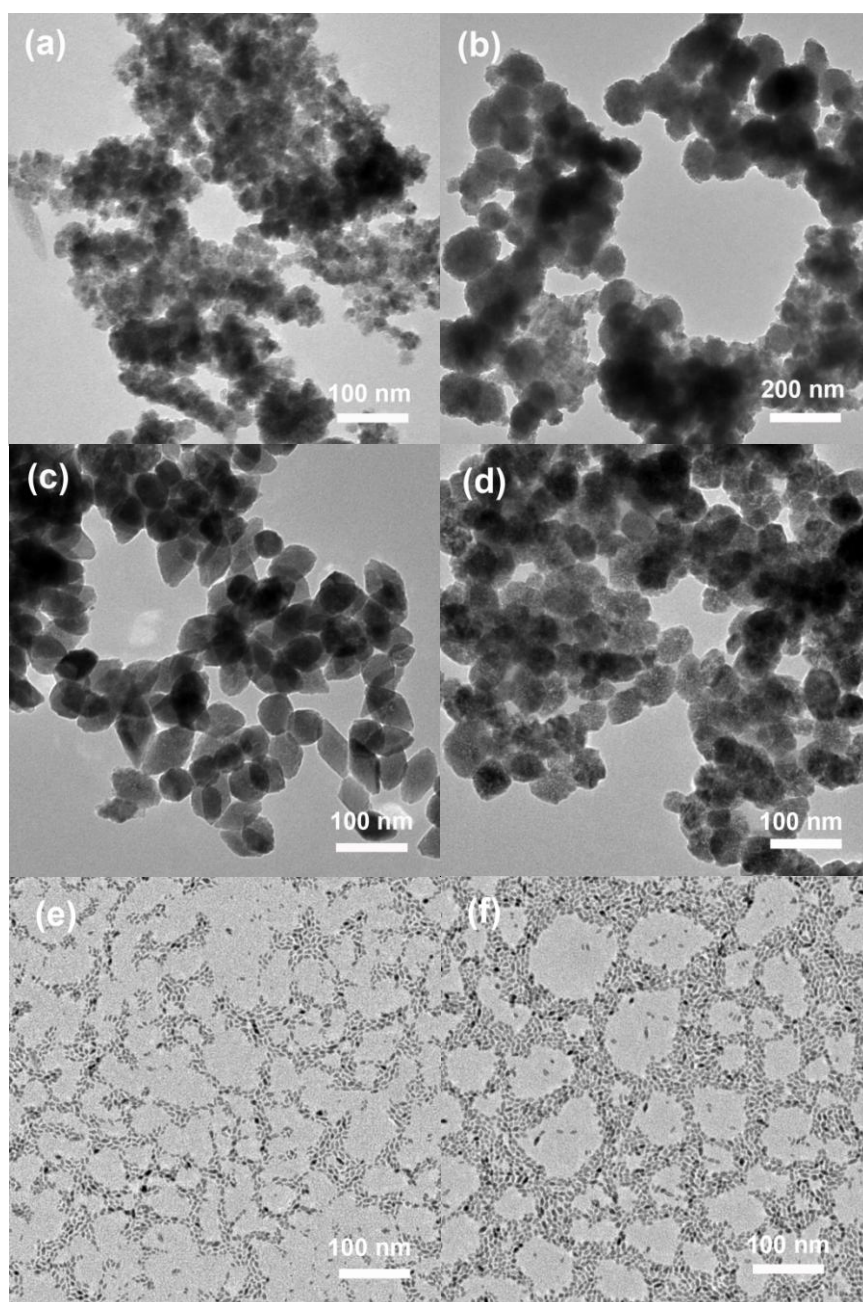

Fig. S5. TEM images of products obtained under the hydrothermal condition of 150 °C for 4 h.. HNO<sub>3</sub> (a), HCl (c), CH<sub>3</sub>COOH (d) and Na<sub>2</sub>SO<sub>4</sub> with the equimolar quantity of hydrogen ion and sulfate ion were used instead of H<sub>2</sub>SO<sub>4</sub> in the system, comparing the samples formed separately from the systems with HNO<sub>3</sub> (b), HCl (d), CH<sub>3</sub>COOH (f) only.
